# Supplementary material for: Does Weight Impact Anidulafungin Pharmacokinetics?
Source: Springer Nature journal article supplement (doi:10.1007/s40262-016-0401-8), 2016-05-03
Supplement: MOESM1 [file 10108362]

**Pharmacokinetics of anidulafungin from prospective clinical trials.**

| Author                      | Population                                                             | n        | Weight (kg)                                  | Dose                                                                                                                                                              | AUC (mg*h/L)                                                                                                           | Cmax                         | CL (L/h)                                                                         | VD (L)                                                     | Ref |
|-----------------------------|------------------------------------------------------------------------|----------|----------------------------------------------|-------------------------------------------------------------------------------------------------------------------------------------------------------------------|------------------------------------------------------------------------------------------------------------------------|------------------------------|----------------------------------------------------------------------------------|------------------------------------------------------------|-----|
| <b>Our obese population</b> | <b>Morbidly obese (BMI &gt;40 kg/m<sup>2</sup>)</b>                    | <b>8</b> | <b>149.7 (mean, range 124.1 –166.5)</b>      | <b>100 mg single dose</b>                                                                                                                                         | <b>74.4 ± 15.4 (mean AUC<sub>0-inf</sub>, SD)</b>                                                                      | <b>3.2 ± 0.6 (mean ± SD)</b> | <b>1.4 ± 0.3 (mean ± SD)</b>                                                     | <b>47.2 ± 5.9 (mean ± SD)</b>                              |     |
| <i>Liu et al.</i>           | General patient population (n=262, pooled from 4 studies) <sup>a</sup> | 262      | 61 (median, range 31 – 154)                  | 2 studies with 100/50 for 14-21 days (n=129 and 19), one study with 100/50, 150/75, 200/100 for 15-42 days (n=87) and one study with 200/100 up to 90 days (n=27) | 110.3 (estimated mean AUC <sub>0-24</sub> , CV 32.5%) for a typical patient with fungal infection receiving 200/100 mg | 7.2 (mean, CV 23.3%)         | 1.3 (mean, IIV 27.2%) for a typical male 70 kg patient with invasive candidiasis | V1 = 11.9 (for a 70 kg patient; no IIV) V2 = 23.5 (no IIV) | (1) |
| <i>Liu et al.</i>           | ICU patients                                                           | 20       | 65 (median, range 48 – 106)                  | 200/100 mg for 10 -42 days                                                                                                                                        | 92.7 (mean AUC <sub>0-24</sub> , CV 41%) <sup>b</sup>                                                                  | 7.7 (mean, CV 56%)           | 1.3 (mean, CV 51%)                                                               | 38.8 (mean, CV 51%, n=10)                                  | (2) |
| <i>Van Wanrooij et al.</i>  | ICU patients                                                           | 20       | 81 (median, IQR 72 – 102)                    | 200/100 mg (unknown duration)                                                                                                                                     | 69.8 ± 24.1 (mean AUC <sub>0-24</sub> , SD)                                                                            | 4.7 ± 1.4 (mean ± SD)        | 1.6 ± 0.6 (mean ± SD)                                                            | N/A                                                        | (3) |
| <i>Leitner et al.</i>       | ICU patients on CVVH                                                   | 10       | 85 (mean, SD 17)                             | 200/100 mg (variable duration)                                                                                                                                    | 109.9 ± 49.8 (mean AUC <sub>0-24</sub> , SD)                                                                           | ND                           | 1.08 ± 0.41 (mean ± SD)                                                          | 42.0 ± 22.6 (mean ± SD)                                    | (4) |
| <i>Aguilar et al.</i>       | ICU patients on CVVHDF                                                 | 12       | 77.5 (mean, SD 8.6)                          | 200/100 mg. (d3)                                                                                                                                                  | 104.1(mean AUC <sub>0-24</sub> , SD ± 20.3 after venous sampling)                                                      | 6.2 ± 1.7 (mean ± SD)        | ND                                                                               | ND                                                         | (5) |
| <i>Brüggemann et al.</i>    | Haematological patients                                                | 20       | 77 (median, range 52 –113)                   | 200 mg q48h (n=10)<br>300 mg q72h (n=10)                                                                                                                          | 348.4 (310.6-386.7) (AUC <sub>0-144</sub> , IQR, q48h)<br>359.4 (319.1-400.9) (AUC <sub>0-144</sub> , IQR, q72h)       | ND                           | 1.49 (mean, IIV 20.2%)                                                           | V1 = 31.8; IIV 19.7%) and V2 = 23.1 (no IIV)               | (6) |
| <i>Liu et al 2014</i>       | Patients with invasive aspergillosis                                   | 140      | 68.3 (median, range 37-117)                  | 200/100mg for a minimum of 14 days                                                                                                                                | ND, reference to pooled analysis by Liu et al.                                                                         | ND                           | 1.2 (mean, IIV 30%) for a typical male 70 kg patient                             | V1 = 8.91 (for a 70 kg patient; no IIV) V2 = 34.1 (no IIV) | (7) |
| <i>Dowell et al.</i>        | Healthy volunteers                                                     | 35       | 75.5 (median, SD ± 10.4, range 52.7 – 100.1) | 200 mg (d4) 100 mg dose (d5 - 13)                                                                                                                                 | 103.4 ± 21.6 (geo mean AUC <sub>0-24</sub> + %CV)                                                                      | 6.88 ± 21.6 (geo mean + %CV) | 0.99 ± 0.24 (mean ± SD)                                                          | 35.2 ± 14.4 (mean ± SD)                                    | (8) |
| <i>Dowell et al.</i>        | Healthy volunteers                                                     | 6        | 73.6 (median, range 56.8 – 88.6)             | 50 mg single dose                                                                                                                                                 | 70 ± 13.4 (AUC <sub>0-inf</sub> , mean + SD)                                                                           | 2.9 ± 0.7 (mean ± SD)        | 0.74 ± 0.15 (mean ± SD)                                                          | 28.5 ± 6.5 (mean ± SD)                                     | (9) |
| <i>Dowell et al.</i>        | Mild hepatic impaired patients                                         | 6        | 82.3 (median, range 71.8 – 104.5)            | 50 mg single dose                                                                                                                                                 | 56.0 ± 11.7 (mean AUC <sub>0-inf</sub> + SD)                                                                           | 2.2 ± 0.3 (mean ± SD)        | 0.93 ± 0.22 (mean ± SD)                                                          | 39.4 ± 9.5 (mean ± SD)                                     | (9) |
| <i>Dowell et al.</i>        | Moderate hepatic impaired patients                                     | 6        | 68.4 (median, range 57.3 – 105.5)            | 50 mg single dose                                                                                                                                                 | 68.6 ± 14.5 (mean AUC <sub>0-inf</sub> + SD)                                                                           | 2.3 ± 0.5 (mean ± SD)        | 0.76 ± 0.20 (mean ± SD)                                                          | 36.5 ± 8.0 (mean ± SD)                                     | (9) |
| <i>Dowell et al.</i>        | Severe hepatic impaired patients                                       | 6-7      | 78.5 (median, range 54.4 – 117.3)            | 50 mg single dose                                                                                                                                                 | 46.6 ± 14.1 (mean AUC <sub>0-inf</sub> + SD)                                                                           | 1.8 ± 0.8 (mean ± SD)        | 1.16 ± 0.34 (mean ± SD)                                                          | 50.8 ± 17.0 (mean ± SD)                                    | (9) |
| <i>Dowell et al.</i>        | Healthy volunteers                                                     | 8        | 84.8 (median, range 68.5 – 95.3)             | 50 mg single dose                                                                                                                                                 | 51.1 ± 5.0 (mean AUC <sub>0-inf</sub> + SD)                                                                            | 2.1 ± 0.2 (mean ± SD)        | 0.99 ± 0.10 (mean ± SD)                                                          | 41.2 ± 2.8 (mean ± SD)                                     | (9) |

|                      |                                  |    |                                   |                                |                                                              |                                                   |                                                     |                                                     |      |
|----------------------|----------------------------------|----|-----------------------------------|--------------------------------|--------------------------------------------------------------|---------------------------------------------------|-----------------------------------------------------|-----------------------------------------------------|------|
| Dowell <i>et al.</i> | Mild renal impaired patients     | 6  | 85.4 (median, range 73.0 – 108.9) | 50 mg single dose              | 52.5 ± 15.2 (AUC0-inf, mean + SD)                            | 2.2 ± 0.5 (mean ± SD)                             | 1.01 ± 0.25 (mean ± SD)                             | 37.6 ± 8.9 (mean ± SD)                              | (9)  |
| Dowell <i>et al.</i> | Moderate renal impaired patients | 7  | 87.1 (median, range 73.6 – 104.8) | 50 mg single dose              | 58.7 ± 12.3 (AUC0-inf, mean + SD)                            | 2.6 ± 0.8 (mean ± SD)                             | 0.88 ± 0.19 (mean ± SD)                             | 35.6 ± 9.4 (mean ± SD)                              | (9)  |
| Dowell <i>et al.</i> | Severe renal impaired patients   | 5  | 77.1 (median, range 50.3 – 123.8) | 50 mg single dose              | 56.5 ± 10.4 (AUC0-inf, mean + SD)                            | 2.4 ± 0.4 (mean ± SD)                             | 0.91 ± 0.15 (mean ± SD)                             | 39.6 ± 9.4 (mean ± SD)                              | (9)  |
| Dowell <i>et al.</i> | End-stage renal disease          | 3  | 71.9 (median, range 59.4 – 110.2) | 50 mg single dose              | 48.1 ± 5.0; predialysis / postdialysis (AUC0-inf, mean + SD) | 1.9 ± 0.2; predialysis / postdialysis (mean ± SD) | 1.05 ± 0.1; predialysis / 0.94 ± 0.34; postdialysis | 37.9 ± 3.8; predialysis / 36.7 ± 12.3; postdialysis | (9)  |
| Dowell <i>et al.</i> | Healthy volunteers               | 17 | ND (BMI 25 median, range 22 – 30) | 200 mg (d1) 100 mg dose (d2-4) | 120.3 ± 24.1 (AUC0-24, mean + SD)                            | 7.9 ± 1.6 (mean ± SD)                             | 0.87 ± 0.20 (mean ± SD)                             | 40.1 ± 9.6 (mean ± SD)                              | (10) |
| Dowell <i>et al.</i> | Healthy volunteers               | 12 | 78.0 ± 20.0 (mean ± SD)           | 200 mg (d1) 100 mg dose (d2-8) | 104.5 (AUC0-24, mean, CV 28.7%)                              | 7.5 (mean, CV 32.5%)                              | 1.04 (mean, CV 33.1%)                               | ND                                                  | (11) |

ND = not determined / not available / not reported

<sup>a</sup> This paper includes a subset of healthy volunteers and patients previously reported by Dowell *et al* in J Clin Pharmacol 2004. The analysis of Liu *et al* contains all original data from Dowell *et al* as well as additional data after ongoing studies were completed.

<sup>b</sup> 1 patient of 240 kg (BMI 83 kg/m<sup>2</sup>) receiving 150 mg (instead of 100 mg maintenance dose): AUC0-24 = 55.3 mg\*h/L. AUC0-24 (extrapolated): 37 mg\*h/L. This patient was excluded from the analysis.

## References:

1. Liu P. Population pharmacokinetic-pharmacodynamic analysis of anidulafungin in adult patients with fungal infections. *Antimicrobial agents and chemotherapy*. 2013;57(1):466-74.
2. Liu P, Ruhnke M, Meersseman W, Paiva JA, Kantecki M, Damle B. Pharmacokinetics of anidulafungin in critically ill patients with candidemia/invasive candidiasis. *Antimicrobial agents and chemotherapy*. 2013;57(4):1672-6.
3. van Wanrooy MJ, Rodgers MG, Uges DR, Arends JP, Zijlstra JG, van der Werf TS, et al. Low but sufficient anidulafungin exposure in critically ill patients. *Antimicrobial agents and chemotherapy*. 2014;58(1):304-8.
4. Leitner JM, Meyer B, Fuhrmann V, Saria K, Zuba C, Jager W, et al. Multiple-dose pharmacokinetics of anidulafungin during continuous venovenous haemofiltration. *J Antimicrob Chemother*. 2011;66(4):880-4.
5. Aguilar G, Azanza JR, Carbonell JA, Ferrando C, Badenes R, Parra MA, et al. Anidulafungin dosing in critically ill patients with continuous venovenous haemodiafiltration. *J Antimicrob Chemother*. 2014;69(6):1620-3.
6. Brüggemann RJ, Van Der Velden WJ, Knibbe CA, Colbers A, Hol S, Burger DM, et al. A rationale for reduced-frequency dosing of anidulafungin for antifungal prophylaxis in immunocompromised patients. *J Antimicrob Chemother*. 2014.
7. Liu P, Mould DR. Population Pharmacokinetic Analysis of Voriconazole and Anidulafungin in Adult Patients with Invasive Aspergillosis. *Antimicrobial agents and chemotherapy*. 2014;58(8):4718-26.
8. Dowell JA, Stogniew M, Krause D, Henkel T, Damle B. Lack of pharmacokinetic interaction between anidulafungin and tacrolimus. *J Clin Pharmacol*. 2007;47(3):305-14.
9. Dowell JA, Stogniew M, Krause D, Damle B. Anidulafungin does not require dosage adjustment in subjects with varying degrees of hepatic or renal impairment. *J Clin Pharmacol*. 2007;47(4):461-70.
10. Dowell JA, Stogniew M, Krause D, Henkel T, Weston IE. Assessment of the safety and pharmacokinetics of anidulafungin when administered with cyclosporine. *Journal of clinical pharmacology*. 2005;45(2):227-33.
11. Dowell JA, Schranz J, Baruch A, Foster G. Safety and pharmacokinetics of coadministered voriconazole and anidulafungin. *Journal of clinical pharmacology*. 2005;45(12):1373-82.
